# Supplementary material for: Interleukin-36 cytokines alter the intestinal microbiome and can protect against obesity and metabolic dysfunction
Source: PubMed Central journal article supplement (PMC6728358; doi:10.1038/s41467-019-11944-w), 2019-09-05
Supplement: 41467_2019_11944_MOESM1_ESM.pdf [file 41467_2019_11944_MOESM1_ESM.pdf]

**Interleukin 36 cytokines alter the intestinal microbiome and can protect against obesity and metabolic dysfunction.**

Giannoudaki et al.

# Supplementary Figure 1

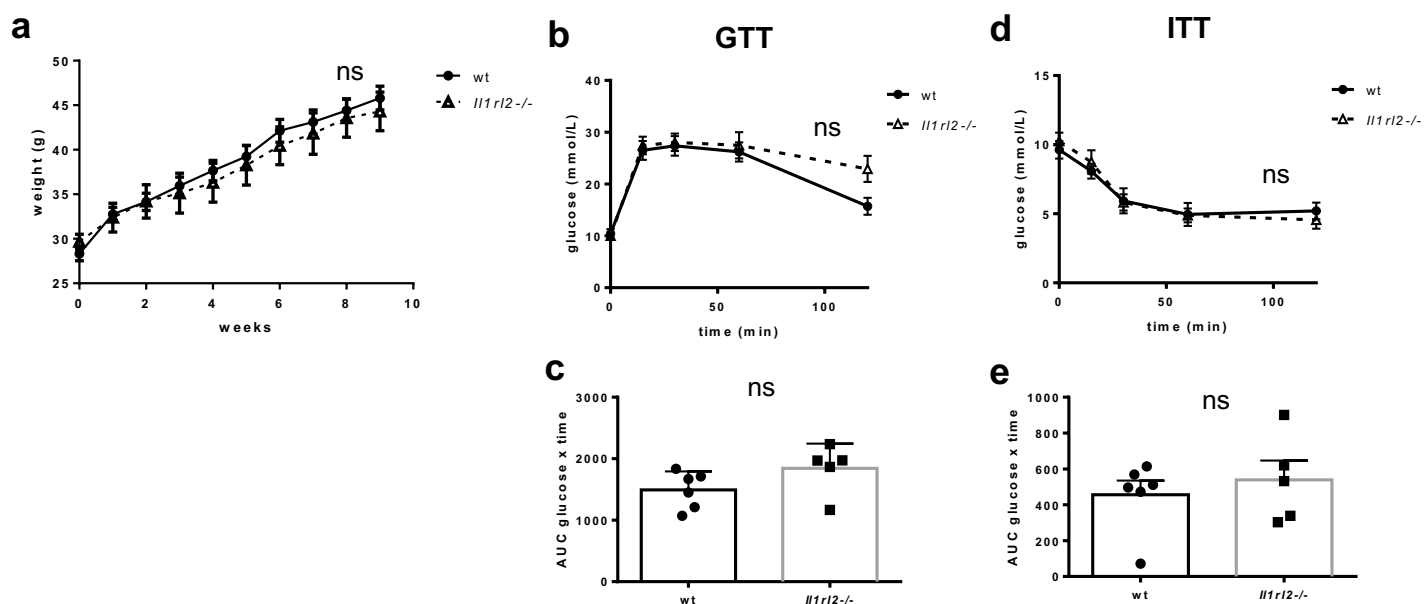

**Supplementary Figure 1. *Il1rl2*<sup>-/-</sup> mice exhibit comparable HFD induced weight gain and glucose/insulin intolerance with wild type controls.** a-e Male *Il1rl2*<sup>-/-</sup> and wt mice of the same age were fed a HFD (60 kcal% fat) for 10 weeks starting from 8 weeks of age (n=5 or 6 per group, representative of 2 independent experiments). a Weights measured weekly. b-c GTT on wt and *Il1rl2*<sup>-/-</sup> mice after 8 weeks in HFD, glucose over time (b) and AUC (c) shown. d-e ITT on wt and *Il1rl2*<sup>-/-</sup> mice after 9 weeks in HFD, glucose over time (d) and inverted AUC (e) shown. Data represent means ± SEM. Statistical analysis using two-tailed unpaired student's t-test, or RM two-way ANOVA for a, b and d. ns p > 0.05

## Supplementary Figure 2

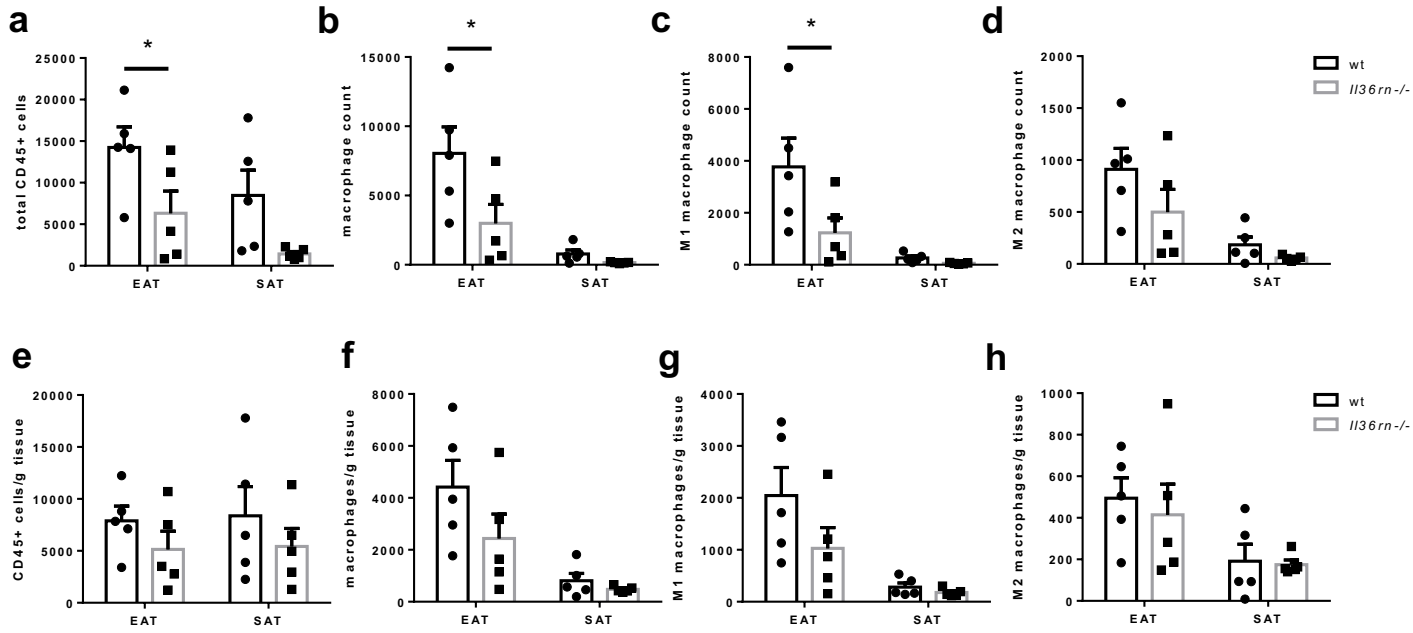

**Supplementary Figure 2. Immune cell infiltration in adipose tissue of *Il36rn*<sup>-/-</sup> and wild type mice after HFD exposure.** **a-d** Absolute numbers of total CD45+ cells (**a**), F4/80+ CD11b+ total macrophages (**b**), F4/80+ CD11b+ CD11c+ CD301- M1 macrophages (**c**), and F4/80+ CD11b+ CD11c- CD301+ M2 macrophages (**d**) in EAT and SAT depots of wt and *Il36rn*<sup>-/-</sup> mice on HFD for 10 weeks (n=5). **e-h** Normalized cells per g of tissue, for total CD45+ cells (**e**), F4/80+ CD11b+ total macrophages (**f**), F4/80+ CD11b+ CD11c+ CD301- M1 macrophages (**g**), and F4/80+ CD11b+ CD11c- CD301+ M2 macrophages (**h**) in EAT and SAT depots of wt and *Il36rn*<sup>-/-</sup> mice on HFD for 10 weeks (n=5). Data show means  $\pm$  SEM. Statistical analysis using two-tailed unpaired student's t-test. \* p < 0.05

## Supplementary Figure 3

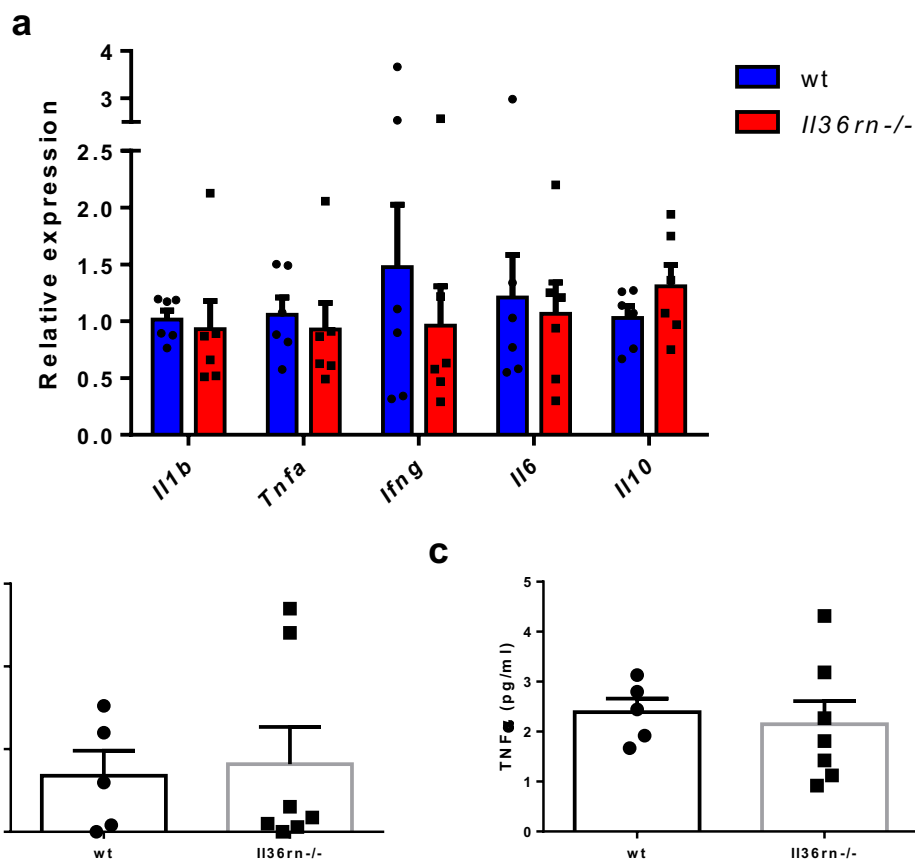

**Supplementary Figure 3. Expression levels of inflammatory mediators in the colon and serum of *Il36rn*<sup>-/-</sup> mice.** **a** Relative gene expression of *Il1b*, *Tnfa*, *Ifng*, *Il6*, and *Il10* in the distal colon of wt and *Il36rn*<sup>-/-</sup> mice. **b-c** Protein concentration as measured by ELISA of IL-6 and TNFα in the serum of wt and *Il36rn*<sup>-/-</sup> mice after HFD. Data show means ± SEM. Statistical analysis using two-tailed Mann-Whitney test for **a** and **b** and two-tailed unpaired student's t-test for **c**.

## Supplementary Figure 4

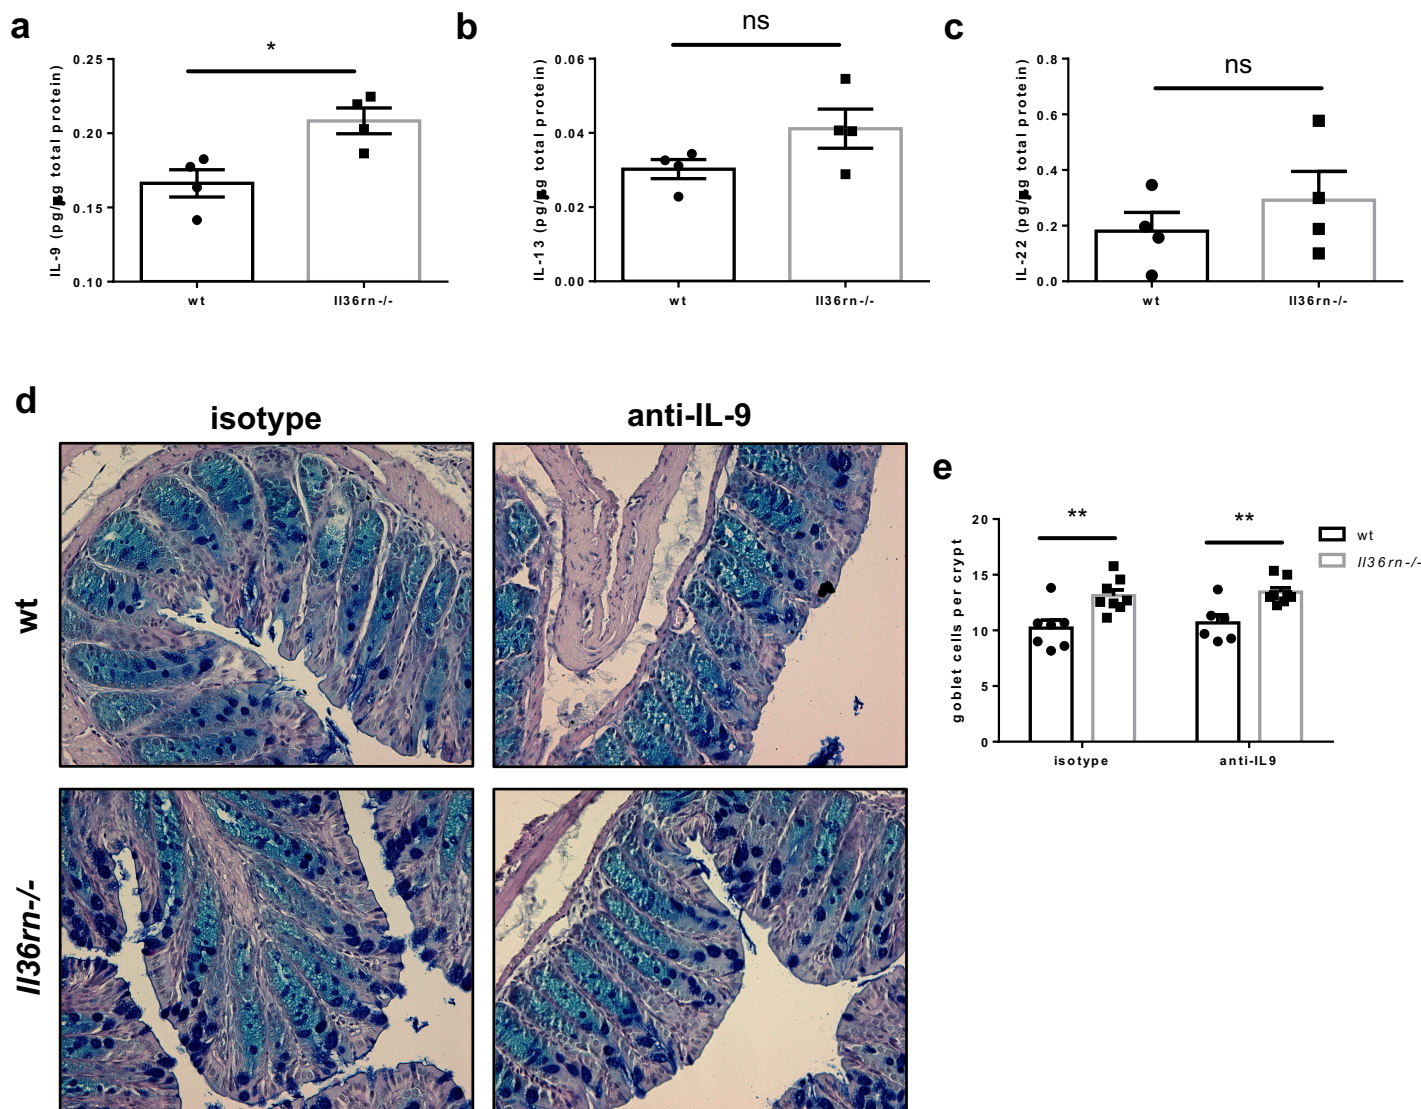

### Supplementary Figure 4. Detection of colon cytokine secretion and IL-9 neutralization

in *Il36rn*<sup>-/-</sup> mice. **a-c** Concentration of secreted IL-9 (**a**), IL-13 (**b**) and IL-22 (**c**) from distal colon explants normalized for total colon tissue protein amount, and measured by ELISA (n=4 per group). **d-e** Representative micrographs of colon sections stained with AB/PAS (**d**) and enumeration of average goblet cells per crypt (**e**) in the colon of wt and *Il36rn*<sup>-/-</sup> mice after repeated injections of anti-IL9 or isotype control antibody every other day for 5 days (n=6-8 per group). Data show means ± SEM. Statistical analysis using two-tailed unpaired student's t-test. ns  $p > 0.05$ , \*  $p < 0.05$ , \*\*  $p < 0.01$

**Supplementary Table 1. Patient Cohort information.**

|                                  | <b>Lean (n=37)</b> | <b>Obese non-diabetic (n=51)</b> | <b>Obese diabetic (n=16)</b>                    |
|----------------------------------|--------------------|----------------------------------|-------------------------------------------------|
| <b>BMI, Kg/m<sup>2</sup></b>     | 22.8 (18-26.2)     | 51.8 (37-78) ***                 | 49.2 (33.9-65) ***                              |
| <b>Weight (kg)</b>               | 65.8 (48.5-85)     | 145 (100.6-181) ***              | 143.4 (94.5-196) ***                            |
| <b>HbA1c, mmol/mol</b>           | 33.7 (28-42)       | 36.8 (29-46) *                   | 66.9 (48-108) ***                               |
| <b>FBG, mmol/liter</b>           | 4.9 (3.1-6.3)      | 5.3 (3.3-7.1)                    | 10.8 (4.7-18) ***                               |
| <b>Cholesterol, mmol/liter</b>   | 5.0 (3.4-7.8)      | 5.1 (3.2-7.2)                    | 4.6 (2.6-6.6)                                   |
| <b>Triglycerides, mmol/liter</b> | 1.1 (0.6-2.5)      | 1.5 (0.6-5.5) *                  | 2.8 (0.7-10.8) ***                              |
| <b>LDL, mmol/liter</b>           | 2.8 (1.5-5.5)      | 3.1 (1.4-5.5)                    | 2.4 (0.8-3.8)                                   |
| <b>HDL, mmol/liter</b>           | 1.7 (1.1-2.8)      | 1.3 (0.9-2.2) ***                | 1.1 (0.8-1.8) ***                               |
| <b>Hypercholesterolemia</b>      | 1/37               | 3/51                             | 10/16                                           |
| <b>Hypertension</b>              | 4/37               | 14/51                            | 9/16                                            |
| <b>M/F</b>                       | 14/23              | 12/39                            | 8/8                                             |
| <b>Age</b>                       | 39.1 (22-65)       | 43.4 (19-66)                     | 50.6 (36-72.5)                                  |
| <b>Medications</b>               | Antibp (4/37)      | Antibp (12/51); Others (18/51)   | Metformin (9/16); Insulin (3/16); Antibp (9/16) |

Clinical data shown as mean with range of values recorded in parentheses. Clinical parameters were compared between Lean and obese non-diabetic, or obese diabetic patients, by Mann-Whitney U test and significant p-values obtained were represented as: \* p<0.05, \*\* p<0.01, \*\*\* p<0.001.

**Supplementary Table 2. TaqMan Gene Expression Assays used.**

| <b>GENE NAME</b>              | <b>ASSAY ID</b> |
|-------------------------------|-----------------|
| <i>Il1f6 (Il36a)</i>          | Mm00457645_m1   |
| <i>Il1f8 (Il36b)</i>          | Mm01337546_g1   |
| <i>Il1f9 (Il36g)</i>          | Mm00463327_m1   |
| <i>Il1rl2 (Il36 receptor)</i> | Mm00519245_m1   |
| <i>Muc2</i>                   | Mm01276696_m1   |
| <i>Il1b</i>                   | Mm00434228_m1   |
| <i>Tnf (Tnfa)</i>             | Mm00443258_m1   |
| <i>Ifng</i>                   | Mm01168134_m1   |
| <i>Il6</i>                    | Mm00446190_m1   |
| <i>Il10</i>                   | Mm01288386_m1   |
